# Supplementary material
Source: HighWire-hosted journal article supplement (https://ard.bmj.com/content/81/1/85)
Supplement: inline-supplementary-material-2 [file inline-supplementary-material-2.pdf]

**Table S1. Primary antibodies used in this study.**

| Source                    | Primary antibodies               | Catalog no.        |
|---------------------------|----------------------------------|--------------------|
| Abcam                     | Rabbit anti-p16 <sup>INK4a</sup> | ab108349           |
| Abcam                     | Rabbit anti-p21                  | ab109199, ab109520 |
| Abcam                     | Mouse anti-Vimentin              | ab8978             |
| Abcam                     | Rabbit anti-GATA4                | ab227512           |
| Abcam                     | Rabbit anti-ATG7                 | ab133528           |
| Abcam                     | Mouse anti-EGFP <sup>a</sup>     | ab184601           |
| Santa Cruz Biotechnology  | Mouse anti-p16 <sup>INK4a</sup>  | sc-1661            |
| Synaptic Systems          | Rabbit anti-m6A                  | 202003             |
| Cell Signaling Technology | Rabbit anti-LC3B                 | 43566              |
| Proteintech               | Rabbit anti-p62                  | 18420-1-AP         |
| Proteintech               | Rabbit anti-METTL3               | 15073-1-AP         |
| Proteintech               | Rabbit anti-YTHDF1               | 17479-1-AP         |
| Proteintech               | Rabbit anti-YTHDF2               | 24744-1-AP         |
| Proteintech               | Rabbit anti-ACTB                 | 20536-1-AP         |

**Table S2. Information of the patients with total knee arthroplasty.**

| Patient Number | Gender | Age | Body-mass index (kg/m <sup>2</sup> ) | Kellgren-Lawrence grading scale |
|----------------|--------|-----|--------------------------------------|---------------------------------|
| 1              | Male   | 51  | 22.64                                | 4                               |
| 2              | Male   | 53  | 23.46                                | 4                               |
| 3              | Female | 53  | 20.85                                | 3                               |
| 4              | Male   | 54  | 22.01                                | 3                               |
| 5              | Male   | 58  | 23.25                                | 4                               |
| 6              | Male   | 59  | 19.7                                 | 3                               |
| 7              | Female | 60  | 23.76                                | 4                               |
| 8              | Male   | 60  | 24.85                                | 4                               |
| 9              | Female | 61  | 24.13                                | 3                               |
| 10             | Female | 63  | 23.68                                | 4                               |

**Table S3. Information of the patients with arthroscopic meniscus repair.**

| Patient Number | Gender | Age | Body-mass index (kg/m <sup>2</sup> ) | Kellgren-Lawrence grading scale |
|----------------|--------|-----|--------------------------------------|---------------------------------|
| 1              | Male   | 51  | 21.33                                | 0                               |
| 2              | Male   | 55  | 23.58                                | 1                               |
| 3              | Female | 55  | 22.49                                | 0                               |
| 4              | Male   | 57  | 24.32                                | 1                               |
| 5              | Male   | 57  | 22.57                                | 0                               |
| 6              | Female | 58  | 19.95                                | 0                               |
| 7              | Male   | 56  | 21.37                                | 0                               |
| 8              | Female | 59  | 20.7                                 | 1                               |
| 9              | Male   | 60  | 23.27                                | 0                               |
| 10             | Male   | 62  | 23.93                                | 0                               |

**Table S4. Characters of patients.**

|                   | Non-OA (n=10) | OA (n=10)    | P value |
|-------------------|---------------|--------------|---------|
| Age               | 57 ± 3.06     | 57.3 ± 4.10  | 0.90    |
| Male:Female       | 7 : 3         | 6 : 4        | 0.64    |
| Body-mass index   | 22.35 ± 1.46  | 22.83 ± 1.58 | 0.49    |
| Kellgren-Lawrence | 0.3 ± 0.48    | 3.6 ± 0.52   | < 0.001 |

Data are presented as mean ± SD. Independent t test for continuous variables and chi-square for categorical values.

Table S5. Primers used for qPCR.

| Target gene          | Primer sequence (5'-3')   |                           |
|----------------------|---------------------------|---------------------------|
|                      | Forward                   | Reverse                   |
| <i>Human IL1B</i>    | GAAATGATGGCTTATTACAGTGGC  | AAAGATGAAGGGAAAGAAGGTGC   |
| <i>Human IL6</i>     | CCTTCGGTCCAGTTGCCTTCTCC   | GCCAGTGCCTCTTTGCTGCTTTC   |
| <i>Human IL8</i>     | TTTCAGGAATTGAATGGGTTTGC   | TGTGAGGTAAGATGGTGGCTAAT   |
| <i>Human IL13</i>    | CAGTGCCATCGAGAAGACCCAGAG  | TCCCTAACCCCTCCTTCCCGCCTA  |
| <i>Human MMP3</i>    | ACAAGGAGGCAGGCAAGACAGCA   | GCCACGCACAGCAACAGTAGGAT   |
| <i>Human MMP13</i>   | GGTGACTGGCAAACCTTGACGATA  | GGACCATTTAAGAGTTCGAGGGA   |
| <i>Human CDKN2A</i>  | AGGGCTTCCTGGACACGCTGGTGGT | CGGCATCTATGCGGGCATGGTTA   |
| <i>Human CDKN1A</i>  | TGATTAGCAGCGGAACAAGGAGT   | TGGAGAAACGGGAACCAGGACAC   |
| <i>Human ATG3</i>    | TGAAGCAAAGCGAGGACAGACAG   | ATCTACCCATCCGCCATCACCAT   |
| <i>Human ATG4B</i>   | GAGCCCGTTTGGATACTGGGTAG   | CTGTTCGATGAATGCGTTGAGGAC  |
| <i>Human ATG4D</i>   | GCTGTACCGTGGGCTTCTATGCTG  | TACCGCTCTGTGGCTGAGGAGGA   |
| <i>Human ATG5</i>    | TGGAGGCAACCTGACCAGAAACA   | AATGATGGCAGTGGAGGAAAGCA   |
| <i>Human ATG7</i>    | AGGTCAAAGGACGAAGATAACAATT | GGTACGGTCACGGAAGCAAACAA   |
| <i>Human ATG10</i>   | GTTGTTGGGCTGAATCTACCTCT   | GTAAACTCTTGGCATTCTTCGTG   |
| <i>Human ATG12</i>   | CACCCATTGCTCCTACTTGTTAC   | ACTGCCCTCTACTGGACTATTTG   |
| <i>Human ATG13</i>   | GCTTTACCTTGGATAGTTGCGTATT | GAACCTGGGATTAGAGGGAGATG   |
| <i>Human ATG14</i>   | GCTGGTCAACATTCTGTCTCATA   | GACTCCTCAAGGTCTGCTCGTAC   |
| <i>Human ATG16L1</i> | CATTCCCGCTTCTGCTGGTTGCT   | CCTCAGTTGCTCCGAGATGTGGC   |
| <i>Human METTL3</i>  | CGCAAGCTGCACTTCAGACGAAT   | CACTGGAATCACCTCCGACACTC   |
| <i>Human METTL14</i> | TCCCATGTACTTACAAGCCGATAT  | ATTAGCAGTGATGCCAGTTTCTC   |
| <i>Human FTO</i>     | AGCACTGTGGAAGAAGATGGAGGGT | TCAGCAGGTAATGTTCCGGGCAAT  |
| <i>Human ALKBH5</i>  | AGTTCAAGCCTATTCGGGTGTCG   | GATCTGAAGCATAGCTGGGTGGTAA |
| <i>Human WTAP</i>    | CTCCCTCAGCGCCATTTTGT      | ACAAAATGGCGCTGAGGGAG      |
| <i>Human GAPDH</i>   | GAATGGGCAGCCGTTAGGAAAGC   | AGCATCACCCGGAGGAGAAATCG   |
| <i>Mouse Il1b</i>    | CAAGCAATACCCAAAGAAGAAGA   | ATTAGAAACAGTCCAGCCCATAC   |
| <i>Mouse Il6</i>     | GGAGCCCACCAAGAACGATAGTCAA | GTCACCAGCATCAGTCCCAAGAA   |



|                     |                           |                         |
|---------------------|---------------------------|-------------------------|
| <i>Mouse Il8</i>    | GGCTTTGCGTTGATTCTGGGAACT  | AGCGGTGTCCTGATTATCGTCCT |
| <i>Mouse Il13</i>   | GATTCCCTGACCAACATCTCCAA   | ATCTCCCTTCCTCCTCAACCCTC |
| <i>Mouse Mmp3</i>   | TTTGATGCAGTCAGCACCCCTCCG  | TCGTGCCCTCGTATAGCCCAGAA |
| <i>Mouse Mmp13</i>  | TCACCTGATTCTTGCGTGCTATG   | CTTTATCTGTGCTCATCTGTGGC |
| <i>Mouse Cdkn2a</i> | GCTTCCTGGACACGCTGGTGGTGCT | AAGGCGGGCTGAGGCCGGATTAG |
| <i>Mouse Cdkn1a</i> | TGAATACCGTGGGTGTCAAAGCA   | AGACAGGGAGGGAGCCACAATAC |
| <i>Mouse Gapdh</i>  | AGGTCGGTGTGAACGGATTTG     | TGTAGACCATGTAGTTGAGGTCA |

Table S6. Primers used for m<sup>6</sup>A MeRIP-qPCR analysis.

| Gene        | Sites  | Primer sequence (5'-3')  |                          |
|-------------|--------|--------------------------|--------------------------|
|             |        | Forward                  | Reverse                  |
| <i>ATG7</i> | Site 1 | GGAGGCAAGAAATAATGGCG     | AAGGCACTACTAAAAGGGGCAA   |
| <i>ATG7</i> | Site 2 | ACCCAGAAGAAGCTGAACGAGT   | CCCAGCAGAGTCACCATTGTAG   |
| <i>ATG7</i> | Site 3 | CGGACCTTGGACCAGCAG       | ACAGATACCATCAATTCCACGG   |
| <i>ATG7</i> | Site 4 | TGAGGAGCTCTCCATCGCC      | GACCTCGGGGTATGGAGGAG     |
| <i>ATG7</i> | Site 5 | CTTGGCCTTGCTATTGACCTG    | TGGGGGATGGCTATCAGTCA     |
| <i>ATG7</i> | Site 6 | TTGGTCCTCCATGCAGTTTTTA   | TCAGGGCCAAGGGGAAAG       |
| <i>ATG7</i> | Site 7 | AGCTGGGTACGAGACTAAAGGG   | AAAGCCATGTCTGAGCAGCTC    |
| <i>ATG7</i> | Site 8 | AGTAAAGTGAATATCAAATACCAA | TTATTTTTGTCAGTTACAGTCCTA |

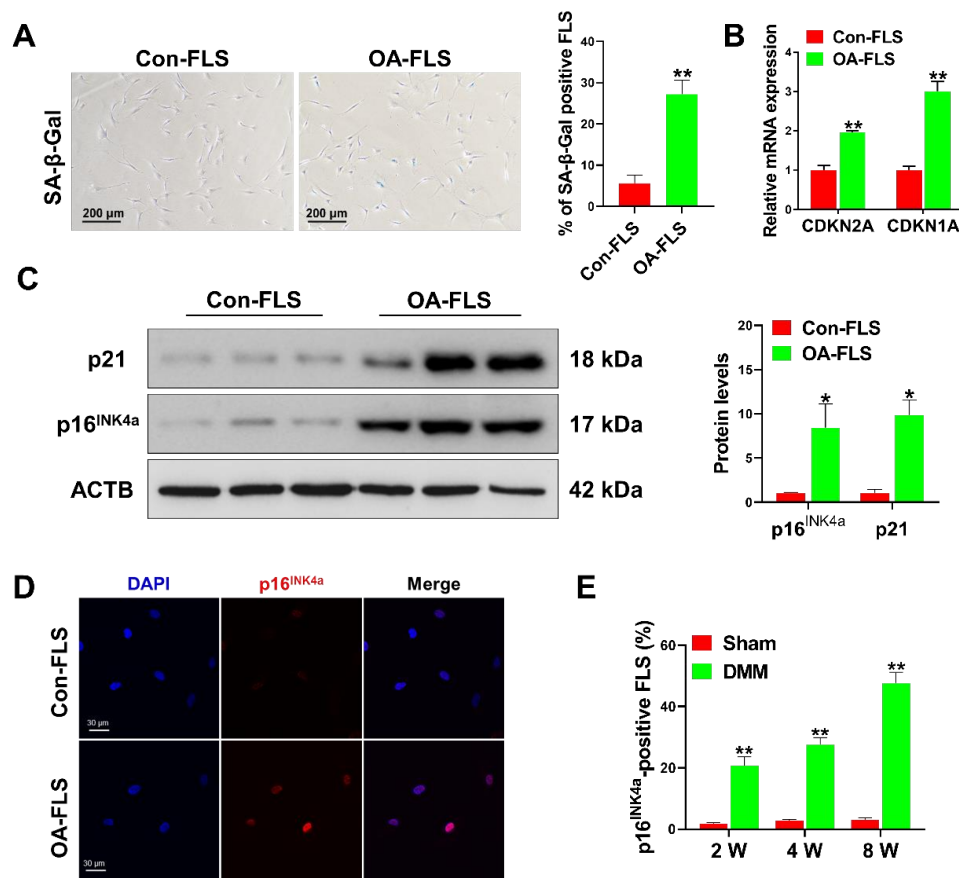

**Figure S1. FLS were senescent in the synovium from patients with OA and OA mice.** (A) The representative images of SA-β-Gal staining FLS (passage 1) derived from synovial tissues of OA patients (OA-FLS) and non-OA patients (Con-FLS) and subsequent quantification of SA-β-Gal positive-staining FLS. n = 3, \*\*P < 0.01. (B) Q-PCR analysis of mRNA levels for CDKN2A and CDKN1A in human FLS (passage 1) from OA patients (OA-FLS) and non-OA patients (Con-FLS). n = 3, \*\*P < 0.01. (C) Western blot analysis of p16<sup>INK4a</sup> and p21 in human FLS (passage 1) from OA patients (OA-FLS) and non-OA patients (Con-FLS). n = 3, \*P < 0.05. (D) The representative images of immunofluorescence staining for p16<sup>INK4a</sup> in FLS (passage 1) from human normal (Con-FLS) or OA synovium (OA-FLS). (E) Quantification of p16<sup>INK4a</sup>-positive FLS as a proportion of total FLS in the synovium from control mice (Sham) or posttraumatic mice at 2, 4 and 8 weeks after destabilisation of the medial meniscus

(DMM) surgery.  $n = 4$  of each group.  $**P < 0.01$ . All data were presented as the means  $\pm$  SEM. Paired  $t$  test (**A**, **B**, **C**) and repeated-measures Two-way ANOVA (**E**) were used for statistical analysis.

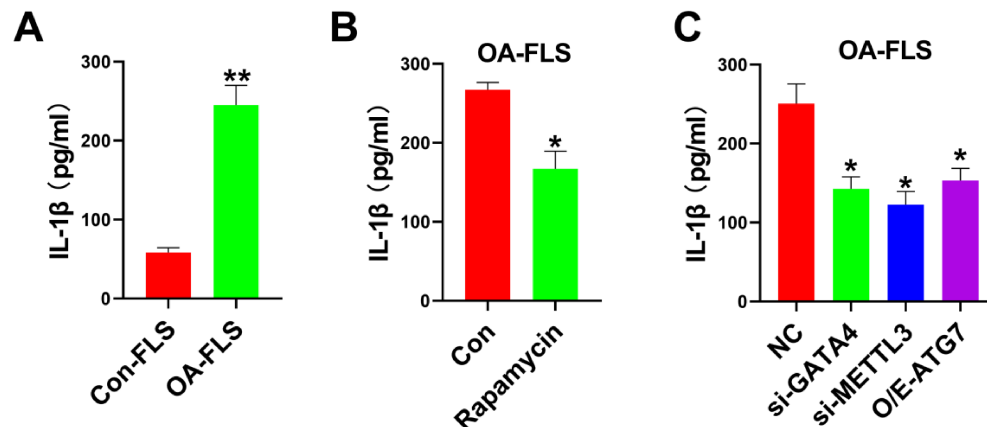

**Figure S2. The production of IL-1 $\beta$  in FLS or OA-FLS with various treatment.** (A) IL-1 $\beta$  levels in the supernatant of FLS or OA-FLS (passage 2). (B) IL-1 $\beta$  levels in the supernatant of OA-FLS (passage 2) with or without the treatment of rapamycin. (C) IL-1 $\beta$  levels in the supernatant of OA-FLS (passage 2) transfected with siRNA targeting GATA4 (si-GATA4), siRNA targeting METTL3 (si-METTL3) or pcDNA3.1-ATG7 vector (O/E-ATG7).  $n = 3$  of each group.  $*P < 0.05$ ,  $**P < 0.01$ . All data were presented as the means  $\pm$  SEM. Paired  $t$  test (**A**, **B**) and one-way ANOVA with Dunnett's multiple comparisons test (**C**) were used for statistical analysis.

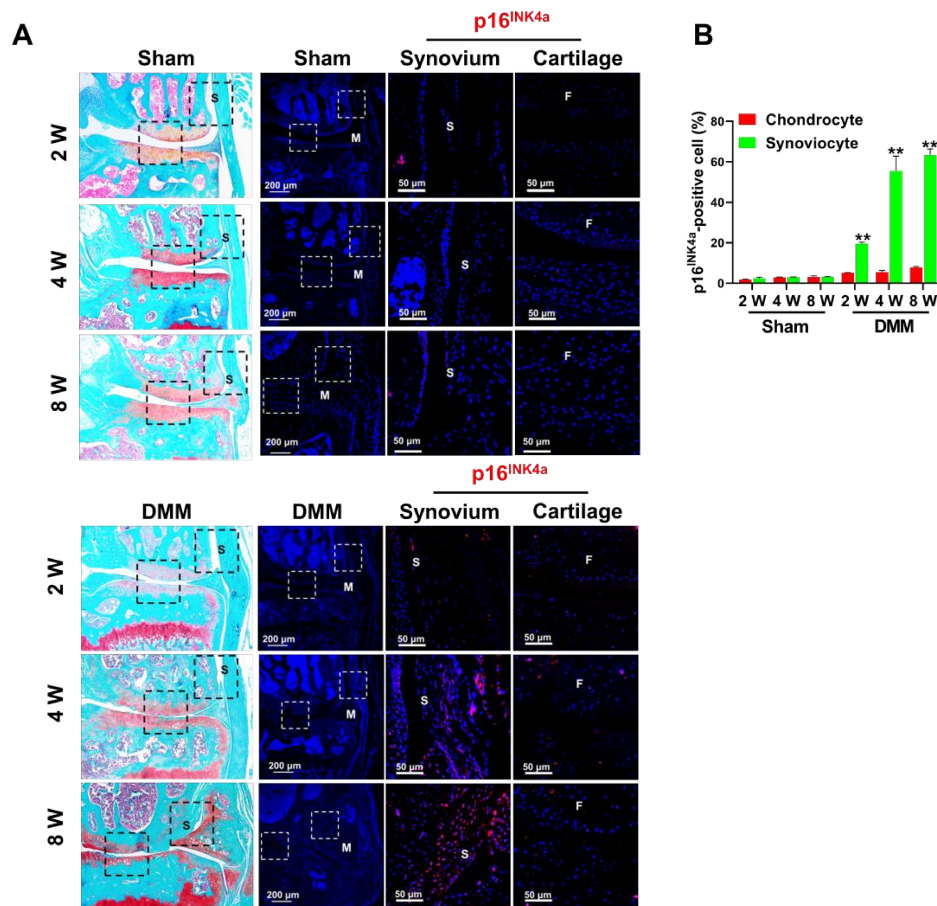

**Figure S3. Cellular senescence in the joint of posttraumatic mice at 2, 4 and 8 weeks after DMM surgery.** (A) Representative images of Safranin O staining and immunostaining for p16<sup>INK4a</sup> in the cartilage and synovium region from control mice (Sham) or posttraumatic mice at 2, 4 and 8 weeks after destabilisation of the medial meniscus (DMM) surgery. The dotted box indicated the amplified synovium or cartilage regions. (B) Quantification of p16<sup>INK4a</sup>-positive FLS as a proportion of total FLS in the synovium from control mice (Sham) or posttraumatic mice at 2, 4 and 8 weeks after destabilisation of the medial meniscus (DMM) surgery.  $n = 4$  of each group. \*\* $P < 0.01$ . All data were presented as the means  $\pm$  SEM. Repeated-measures Two-way ANOVA was used for statistical analysis. F, femur; S, synovium; M, meniscus.

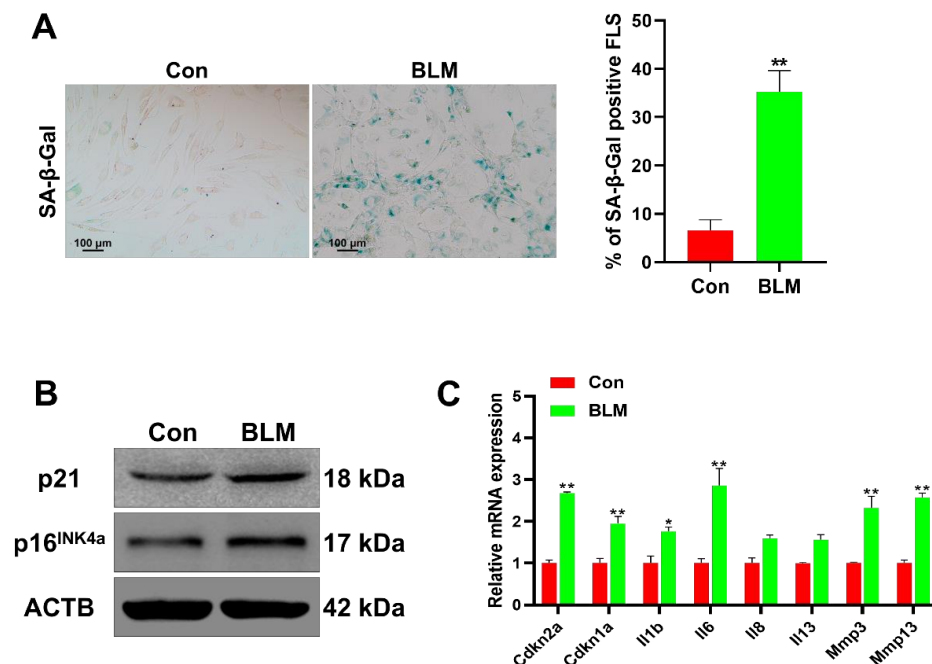

**Figure S4. Bleomycin (BLM) induces FLS senescence.** (A) The SA-β-Gal staining and semi-quantification of SA-β-Gal level in FLS (Passage 2) isolated from mouse synovium after 7 days of bleomycin (10 μM; n = 5) treatment. \*\* $P < 0.01$ . (B) Western blot analysis of p16<sup>INK4a</sup> and p21 protein levels in mouse FLS (Passage 2) 7 days after treatment with or without BLM. (C) Q-PCR analysis for the mRNA expression of Cdkn2a, Cdkn1a, Il1b, Il6, Il8, Il13, Mmp3 and Mmp13 in mouse FLS with or without the treatment of BLM. n = 3, \* $P < 0.05$ , \*\* $P < 0.01$ . All data were presented as the means ± SEM. Paired t test was used for statistical analysis.

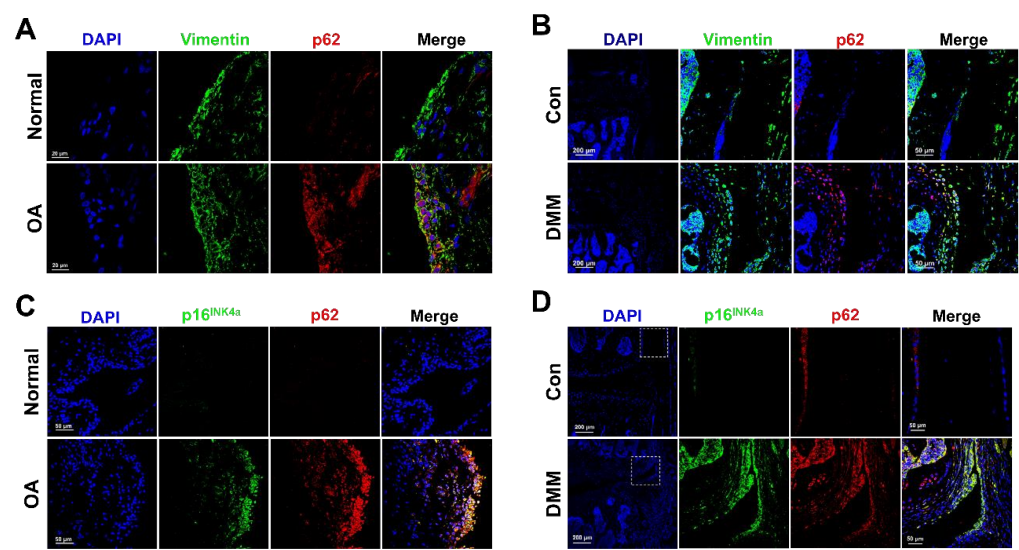

**Figure S5. Autophagy is impaired in FLS from patients with OA and DMM-induced OA mice.** (A, B) The representative images of co-immunostaining of Vimentin and p62 in the synovium from patients with OA and posttraumatic mice 8 weeks after destabilisation of the medial meniscus (DMM) surgery. (C, D) The representative images of co-immunostaining of p16<sup>INK4a</sup> and p62 in the synovium from patients with OA and posttraumatic mice 8 weeks after DMM surgery. The dotted box indicated the amplified synovium regions.

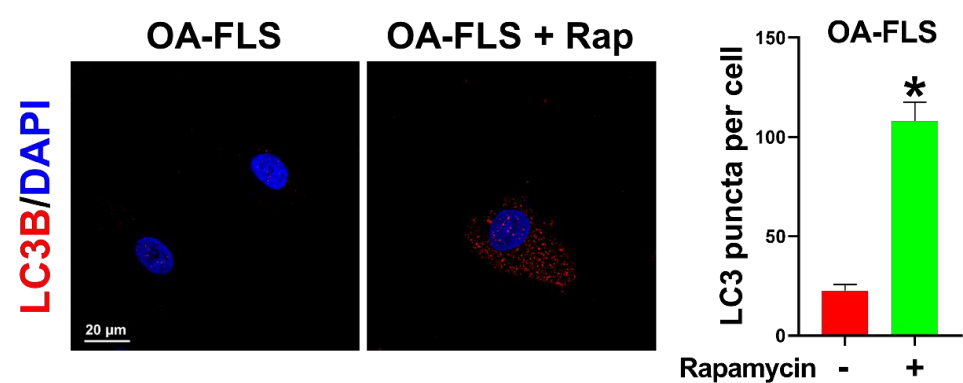

**Figure S6. The expression of LC3B in OA-FLS treated with rapamycin.** The representative image of immunofluorescent staining of LC3B in human OA-FLS (passage 2) with the treatment of rapamycin or not, and the average number of LC3B

puncta per cell was quantified via imageJ.  $n = 3$  per group,  $*P < 0.05$ . All data were presented as the means  $\pm$  SEM. Paired t test was used for statistical analysis.

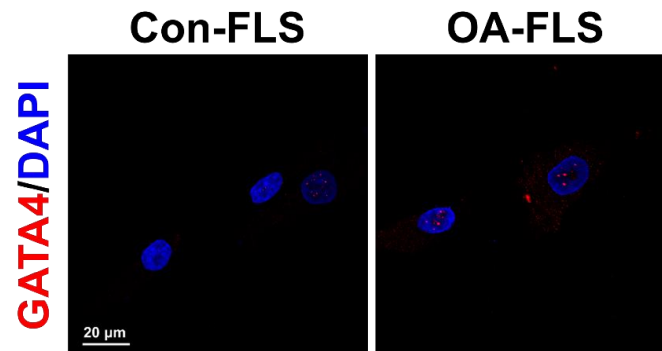

**Figure S7. The expression of GATA4 in human FLS from OA patients.** The representative images of immunofluorescent staining of GATA4 in human Con-FLS and OA-FLS (passage 2).

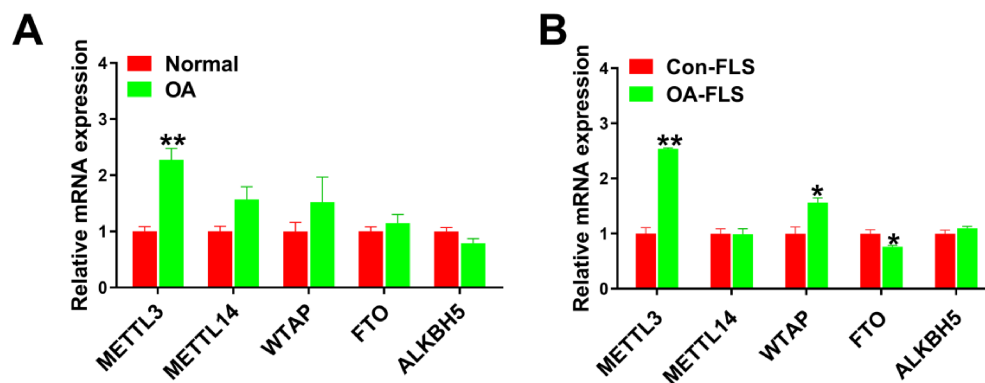

**Figure S8. The expression of m<sup>6</sup>A regulatory enzymess *in vivo* and *in vitro*.** (A, B) Q-PCR analysis of mRNA levels for METTL3, METTL14, WTAP, FTO and ALKBH5 in human synovial tissues (A,  $n = 10$ ) and FLS (passage 2) derived from OA patients or non-OA patients (B,  $n = 3$ ).  $*P < 0.05$ ,  $**P < 0.01$ . All data were presented as the means  $\pm$  SEM. Paired t test was used for statistical analysis.

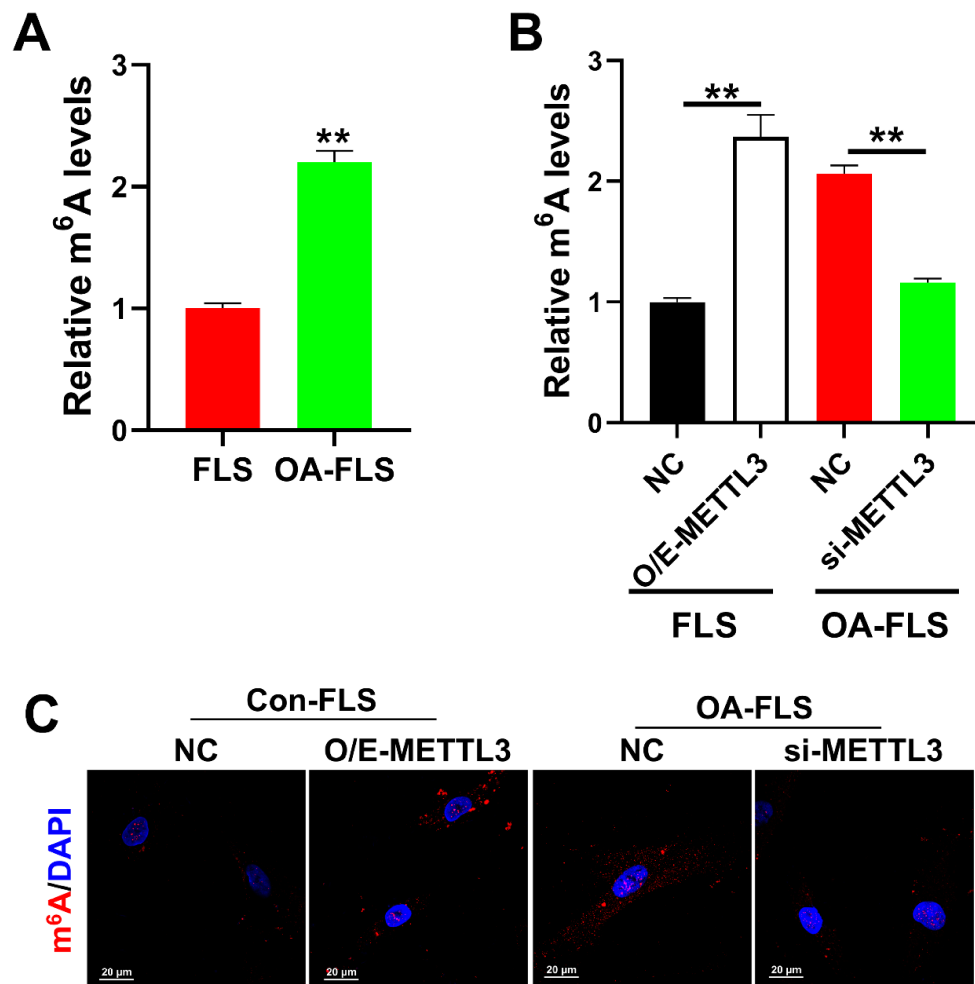

**Figure S9. METTL3 regulates m<sup>6</sup>A levels in human FLS.** (A) Relative m<sup>6</sup>A levels were measured by ELISA-based m<sup>6</sup>A quantitative analyses in human FLS and OA-FLS. *n* = 3 per group, \*\**P* < 0.01. (B) FLS (passage 2) were transfected with pcDNA3.1-METTL3 vector (O/E-METTL3; O/E, overexpression), and OA-FLS were transfected with siRNA targeting METTL3 (si-METTL3). Relative m<sup>6</sup>A levels were measured by ELISA-based m<sup>6</sup>A quantitative analyses. *n* = 3 per group, \*\**P* < 0.01. (C) The representative images of immunofluorescent detection of m<sup>6</sup>A in human Con-FLS and OA-FLS (passage 2) treated as in B. All data were presented as the means ± SEM. Paired *t* test (A) and one-way ANOVA with Dunnett's multiple comparisons



test (B) were used for statistical analysis.

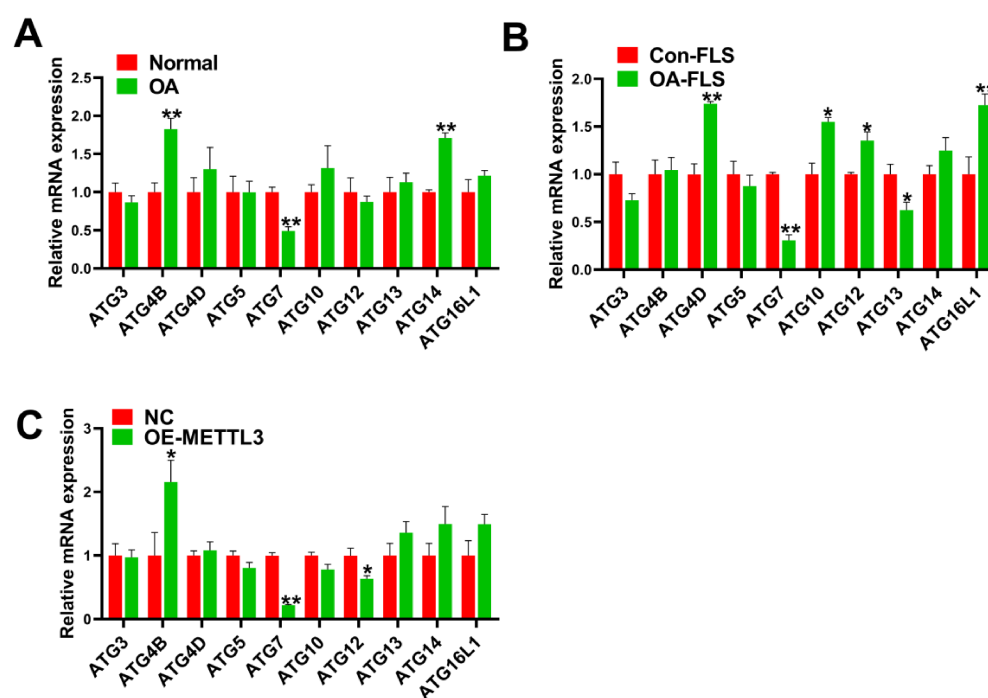

**Figure S10. The expression of ATGs in vivo and in vitro.** (A, B) Q-PCR analysis of mRNA levels for autophagy-related ATGs (ATG6, ATG4B, ATG4D, ATG6, ATG7, ATG10, ATG12, ATG13, ATG14 and ATG16L1) in synovial tissues (A) and FLS (B) derived from OA patients or non-OA patients. (C) Q-PCR analysis of ATGs mRNA expression in human Con-FLS transfected with or without pcDNA3.1-METTL3 vector (O/E-METTL3; O/E, overexpression). All data were presented as the means  $\pm$  SEM. Paired t test was used for statistical analysis. \* $P < 0.05$ , \*\* $P < 0.01$ .

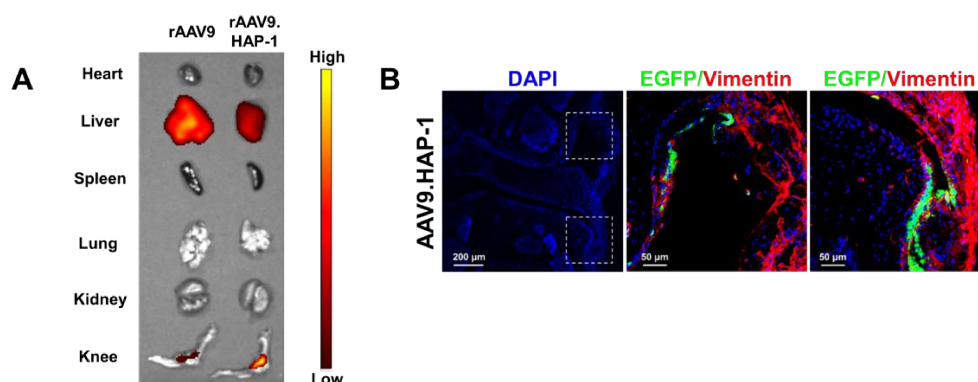

**Figure S11. The FLS specificity of rAAV9.HAP-1.** (A) The fluorescence signal of EGFP in individual organs and tissues (heart, liver, spleen, lung, kidney and knee joint) from mice after intra-articular injection with a signal dose of  $2 \times 10^{11}$  genome copies of rAAV9 or rAAV9.HAP-1. (B) Confocal microscope analysis of co-staining of Vimentin and EGFP in the knee joints from mice after intra-articular injection with rAAV9 or rAAV9.HAP-1.

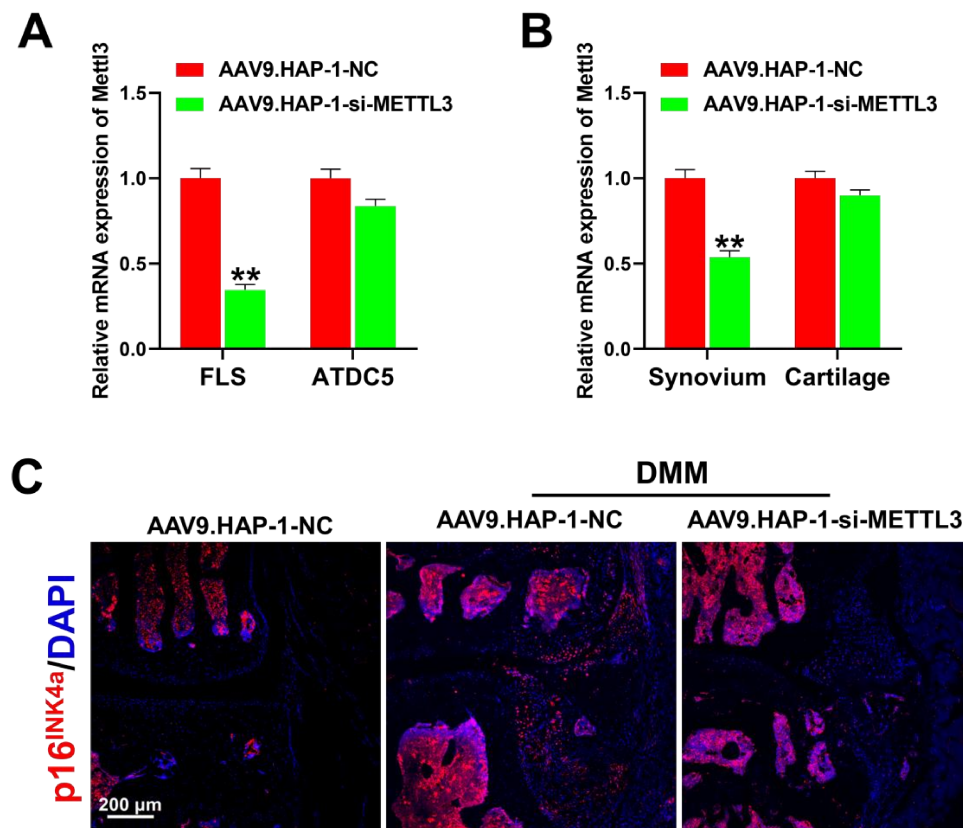

**Figure S12. Targeted inhibition of METTL3 in FLS suppresses the expression p16<sup>INK4a</sup> in vivo.** (A) Q-PCR analysis of mRNA levels for METTL3 in FLS (passage 2) and ATDC5 cells transfected with rAAV9.HAP-1-NC or rAAV9.HAP-1-si-METTL3.  $n = 3$ ,  $**P < 0.01$ . (B) Q-PCR analysis of mRNA levels for METTL3 in the cartilage and synovium of mice treated with rAAV9.HAP-1-NC or rAAV9.HAP-1-si-METTL3.  $n = 3$ ,  $**P < 0.01$ . (C) The representative images of immunofluorescent staining of p16<sup>INK4a</sup> in the knee joint from DMM-induced OA mice after intra-articular injection with rAAV9.HAP-1-NC and rAAV9.HAP-1-si-METTL3. All data were presented as the means  $\pm$  SEM. Paired t test was used for statistical analysis.
